# Supplementary material for: Effect of Solvent on Fluorescence Emission from Polyethylene Glycol-Coated Graphene Quantum Dots under Blue Light Illumination
Source: MDPI journal article supplement (doi:10.3390/nano11061383), 2021-05-24
Supplement: s1 [file s1]

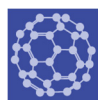

## Article

# Effect of Solvent on Fluorescence Emission from Polyethylene Glycol-Coated Graphene Quantum Dots under Blue Light Illumination

Po-Chih Yang <sup>1,\*</sup>, Yu-Xuan Ting <sup>1</sup>, Siyong Gu <sup>2</sup>, Yasser Ashraf Gandomi <sup>3</sup>, Jianlin Li <sup>4</sup>, Chien-Te Hsieh <sup>1,\*</sup>

<sup>1</sup> Department of Chemical Engineering and Materials Science, Yuan Ze University, Taoyuan 32003, Taiwan; danny0935331003@gmail.com

<sup>2</sup> Fujian Provincial Key Laboratory of Functional Materials and Applications, School of Materials Science and Engineering, Xiamen University of Technology, Xiamen 361024, China; gu-siyong@163.com

<sup>3</sup> Department of Chemical Engineering, Massachusetts Institute of Technology, Cambridge, MA 02142, USA; ygandomi@mit.edu

<sup>4</sup> Electrification and Energy Infrastructure Division, Oak Ridge National Laboratory, Oak Ridge, TN 37831, USA; lij4@ornl.gov

\* Correspondence: pcyang@saturn.yzu.edu.tw (P.-C.Y.); cthsieh@saturn.yzu.edu.tw (C.-T.H.)

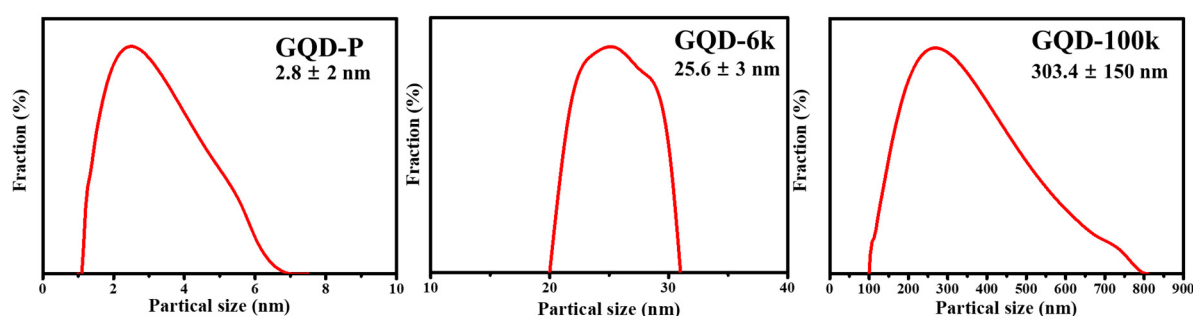

**Figure S1.** Particle size distributions of different GQD samples determined from DLS technique.

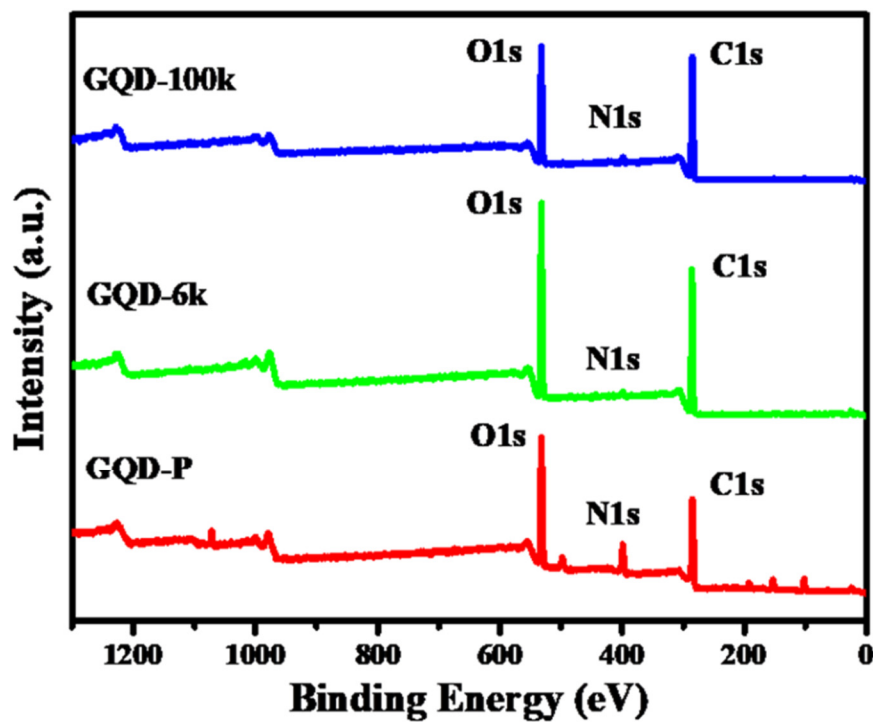

Figure S2. Survey-scan XPS spectra of pristine GQD and PEG-coated GQD cluster samples.

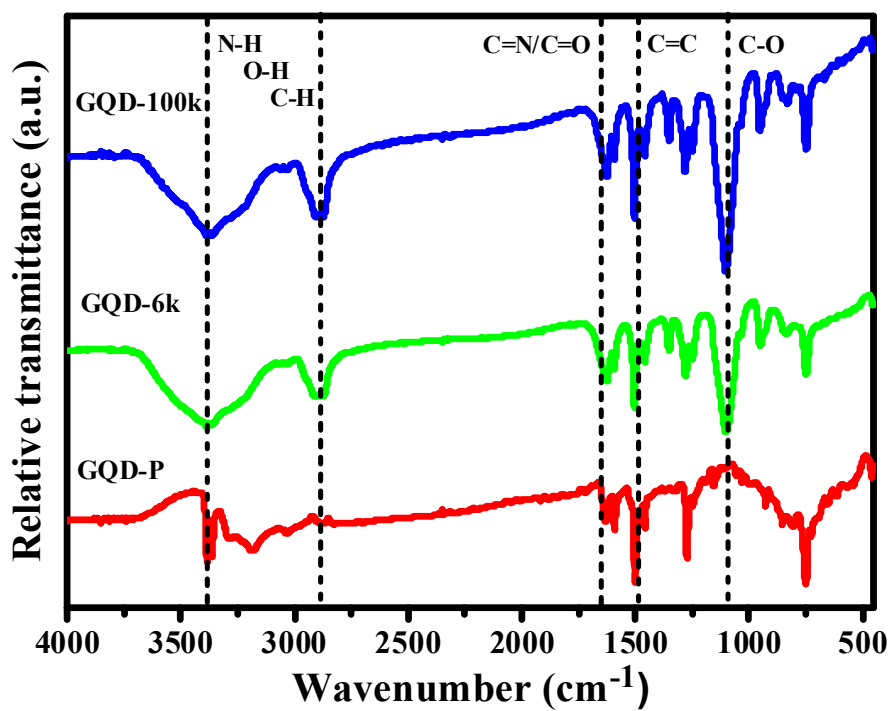

Figure S3. FT-IR spectra of pristine GQD and PEG-coated GQD cluster samples.

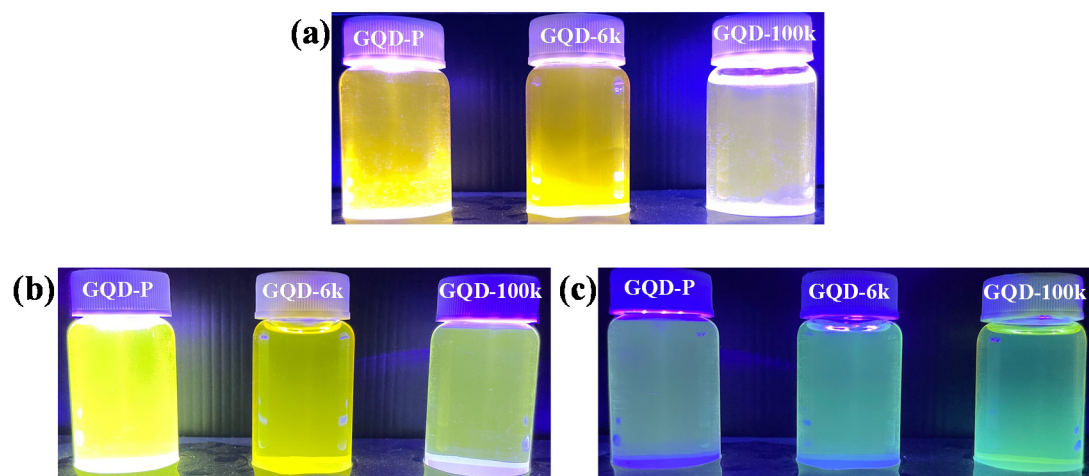

**Figure S4.** Photographs of different GQD suspensions at 450 nm: (a) water, (b) ethanol, and (c) PGMEA.
